# Supplementary material for: Intestinal Bacterial Diversity and Functional Analysis of Three Lepidopteran Corn Ear Worm Larvae
Source: MDPI journal article supplement (doi:10.3390/insects13080740), 2022-08-17
Supplement: s1 [file s1]

## Supplementary Figures

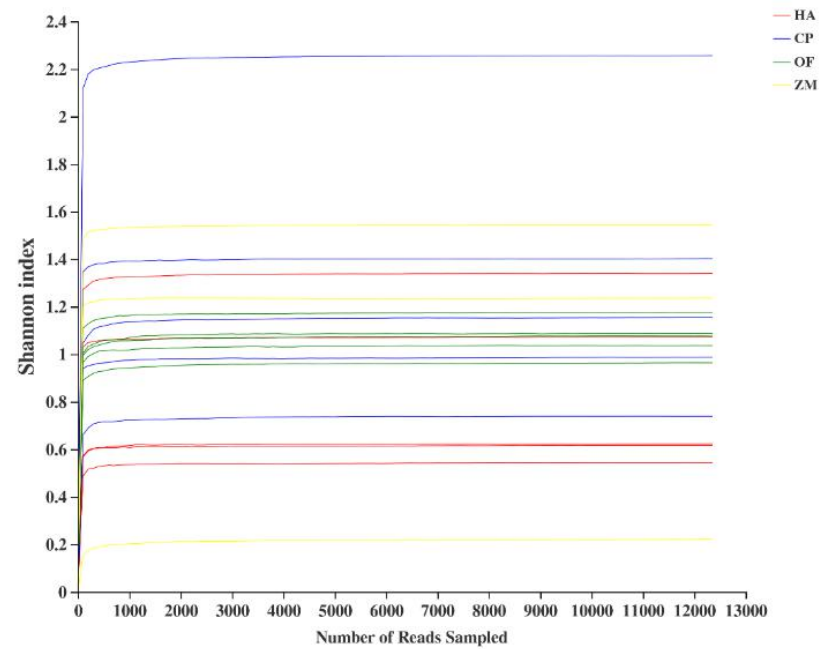

**Figure S1.** Shannon rarefaction curves for all samples. HA, *H. armigera*; CP, *C. punctiferalis*; OF, *O. furnacalis*; ZM, *Z. mays*.

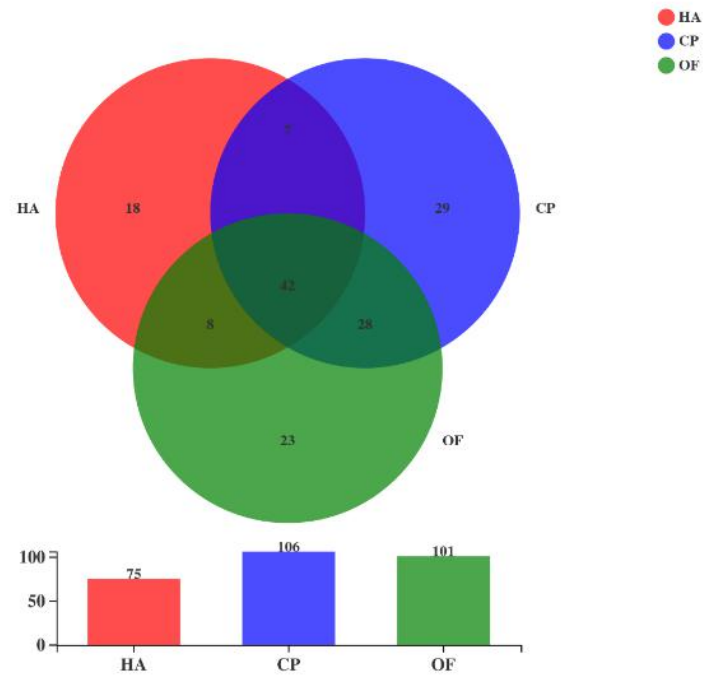

**Figure S2.** Venn diagram at OTU level. HA, *H. armigera*; CP, *C. punctiferalis*; OF, *O. furnacalis*.

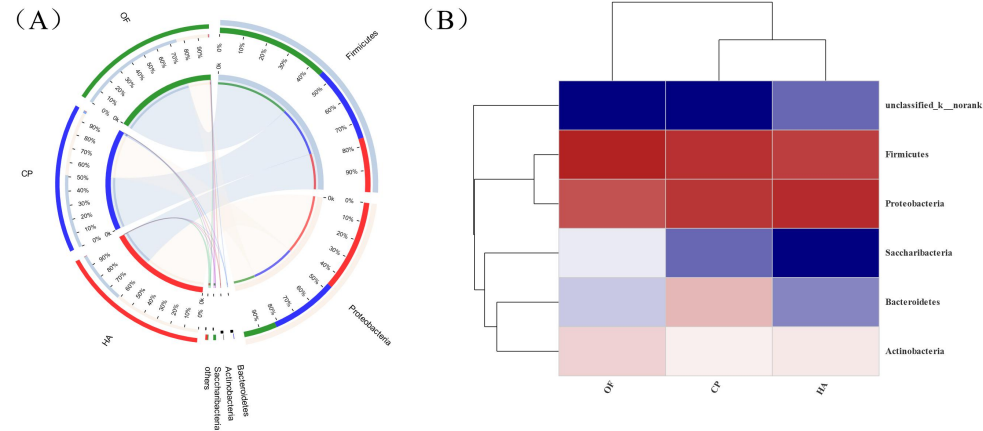

**Figure S3.** Circos (A) and distance heatmap (B) based on phylum level. Circos (A) shows distribution proportion of dominant species in each sample and distribution proportion of dominant species in different samples. The columns (B) represent the samples and the rows represent the bacterial assigned to the phylum level. Dendrograms of hierarchical cluster analysis grouping genera and samples are shown on the left and at the bottom, respectively. The color scale represents the normalized values of relative abundances by log10. HA, *H. armigera*; CP, *C. punctiferalis*; OF, *O. furnacalis*. Taxa with an abundance < 1% are included in 'Other'.

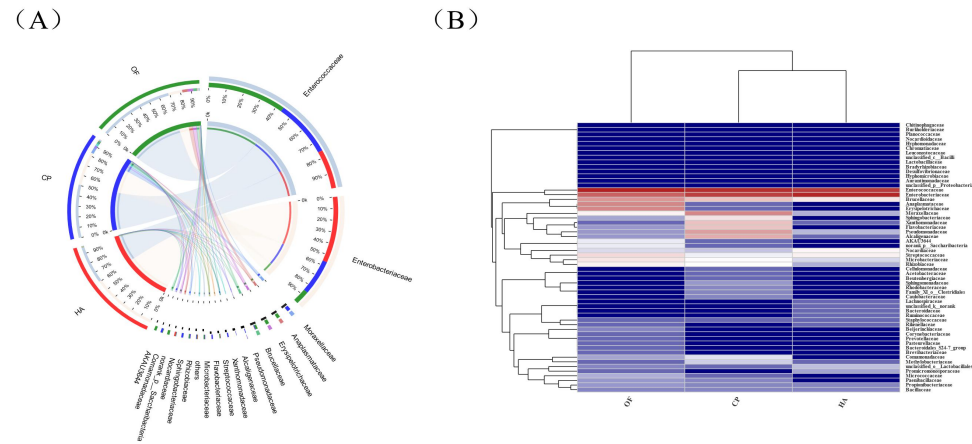

**Figure S4.** Circos (A) and distance heatmap (B) based on family level. Circos (A) shows distribution proportion of dominant species in each sample and distribution proportion of dominant species in different samples. The columns (B) represent the samples and the rows represent the bacterial assigned to the family level. Dendrograms of hierarchical cluster analysis grouping genera and samples are shown on the left and at the bottom, respectively. The color scale represents the normalized values of relative abundances by log10. HA, *H. armigera*; CP, *C. punctiferalis*; OF, *O. furnacalis*. Taxa with an abundance < 1% are included in 'Other'.

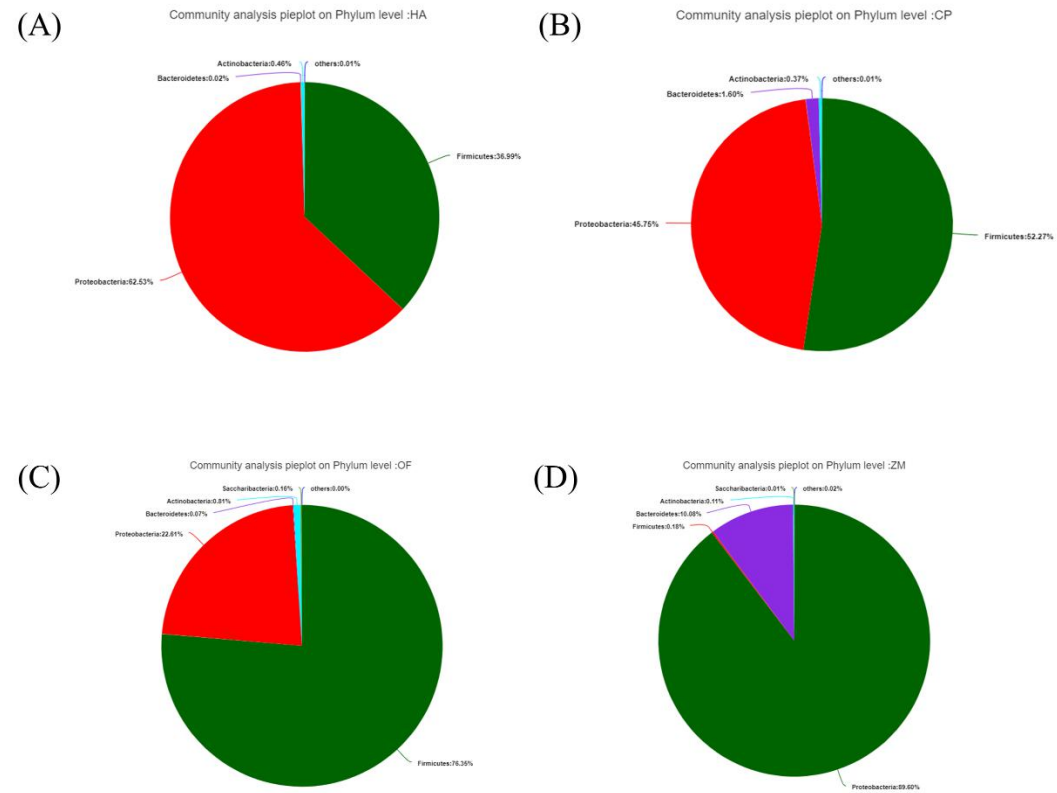

**Figure S5.** Pie chart of the intestinal and corn microbial community at phylum level. Different colors represent different phylum. HA, *H. armigera* (A); CP, *C. punctiferalis* (B); OF, *O. furnacalis* (C); ZM, *Z. mays* (D).

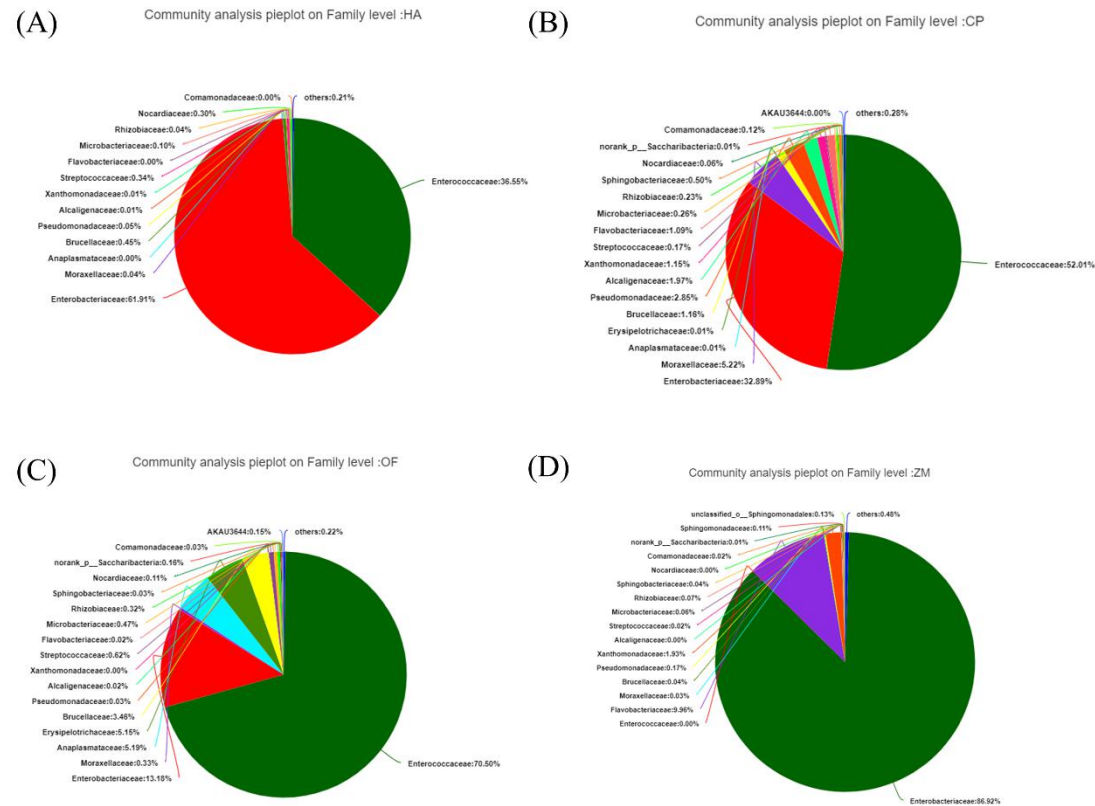

**Figure S6.** Pie chart of the intestinal and corn microbial community at family level. Different colors represent different families. HA, *H. armigera* (A); CP, *C. punctiferalis* (B); OF, *O. furnacalis* (C); ZM, *Z. mays* (D).

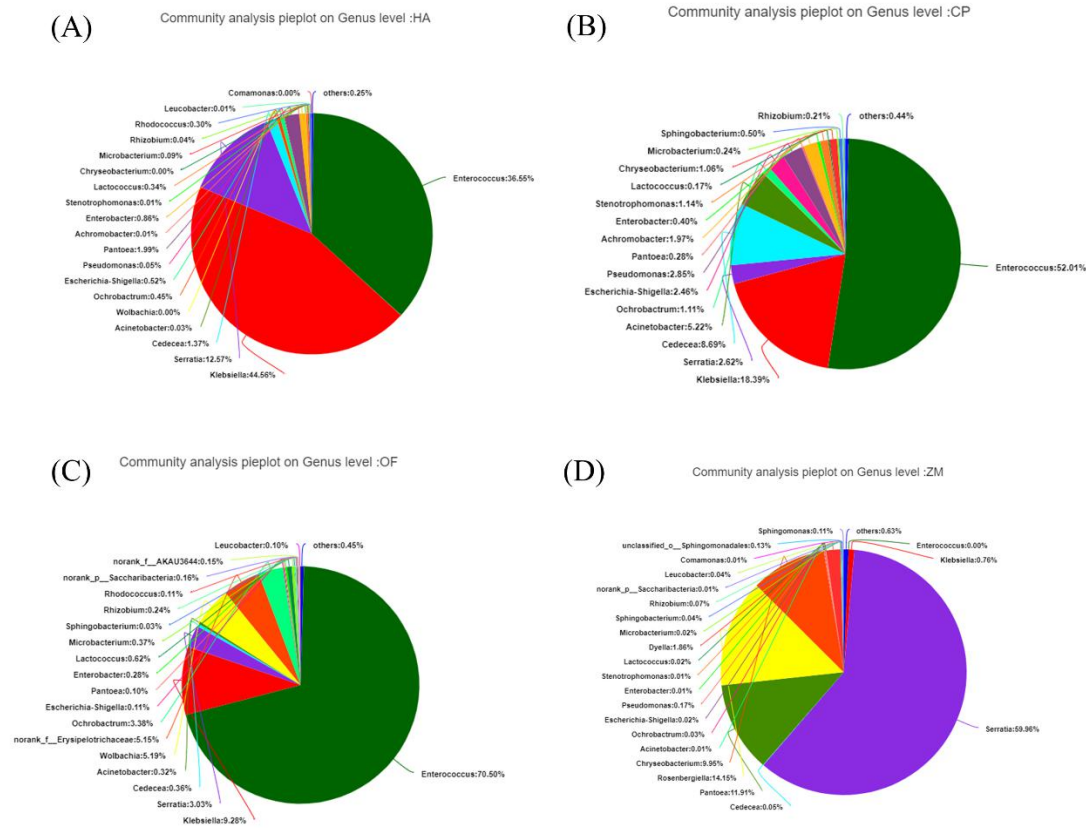

**Figure S7.** Pie chart of the intestinal and corn microbial community at genus level. Different colors represent different genus. HA, *H. armigera* (A); CP, *C. punctiferalis* (B); OF, *O. furnacalis* (C); ZM, *Z. mays* (D).

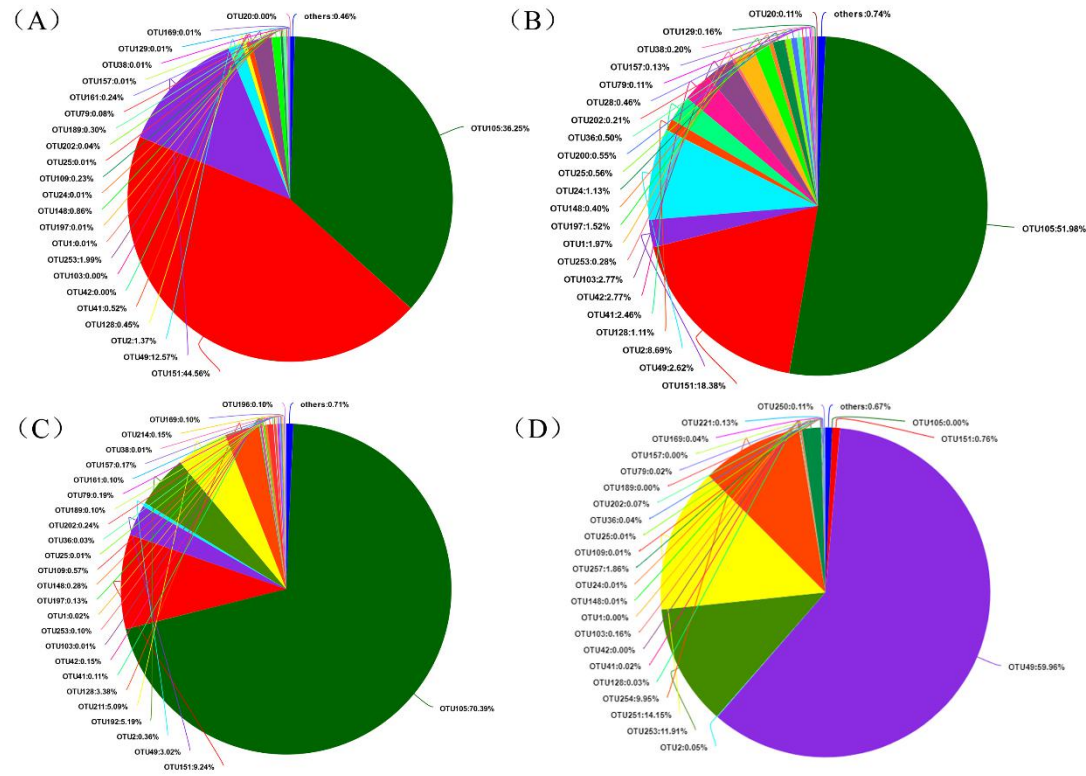

**Figure S8.** Pie chart of the intestinal and corn microbial community at OTU level. Different colors represent different OTUs. HA, *H. armigera* (A); CP, *C. punctiferalis* (B); OF, *O. furnacalis* (C); ZM, *Z. mays* (D).



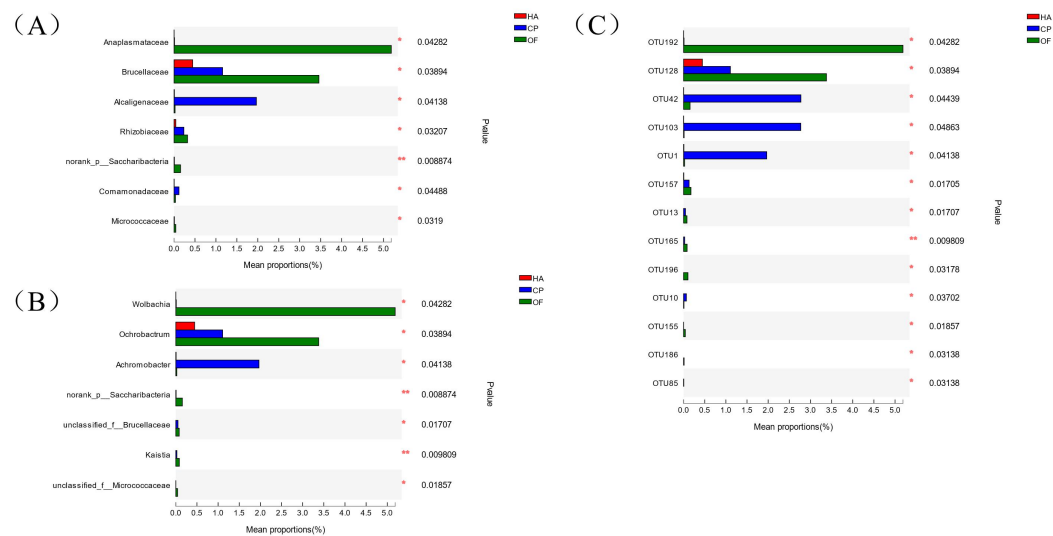

**Figure S9.** Significance difference test based on Kruskal-Wallis rank sum test method at family level (A), genus level (B) and OTU level (C). Y-axis represents the species name at a taxonomic level, X-axis represents the average relative abundance in different groups of species, and columns with different colors represent different groups. On the far right is the p value, \*  $0.01 < P \leq 0.05$ , \*\*  $0.001 < P \leq 0.01$ . HA, *H. armigera*; CP, *C. punctiferalis*; OF, *O. furnacalis*.

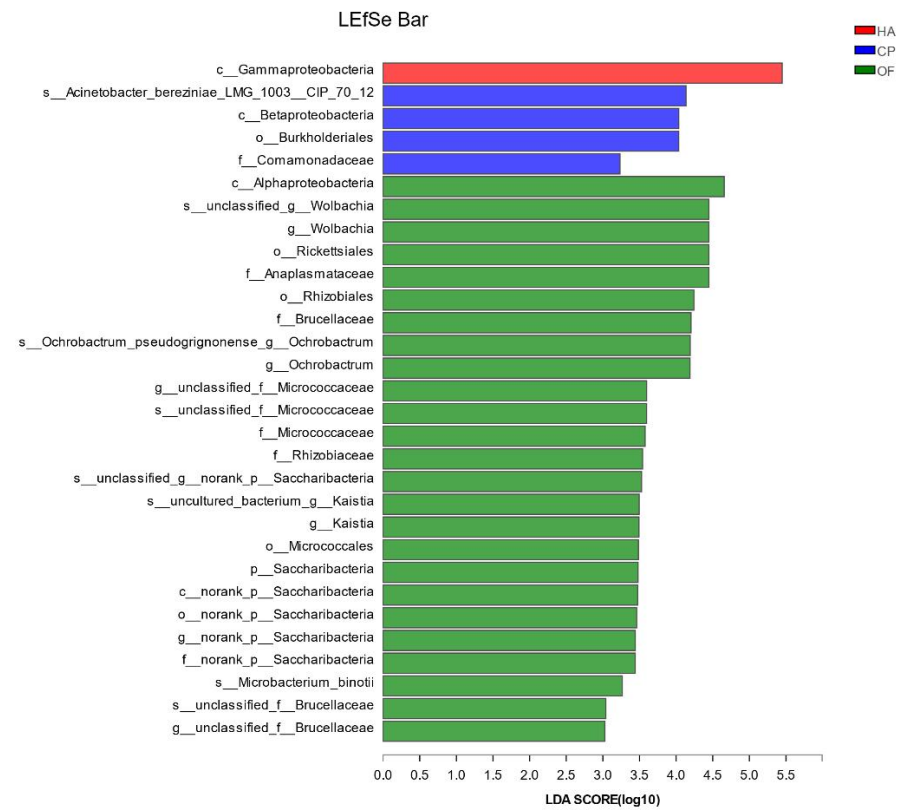

**Figure S10.** Linear discriminant analysis (LDA) of three pests. HA, *H. armigera*; CP, *C. punctiferalis*; OF, *O. furnacalis*.

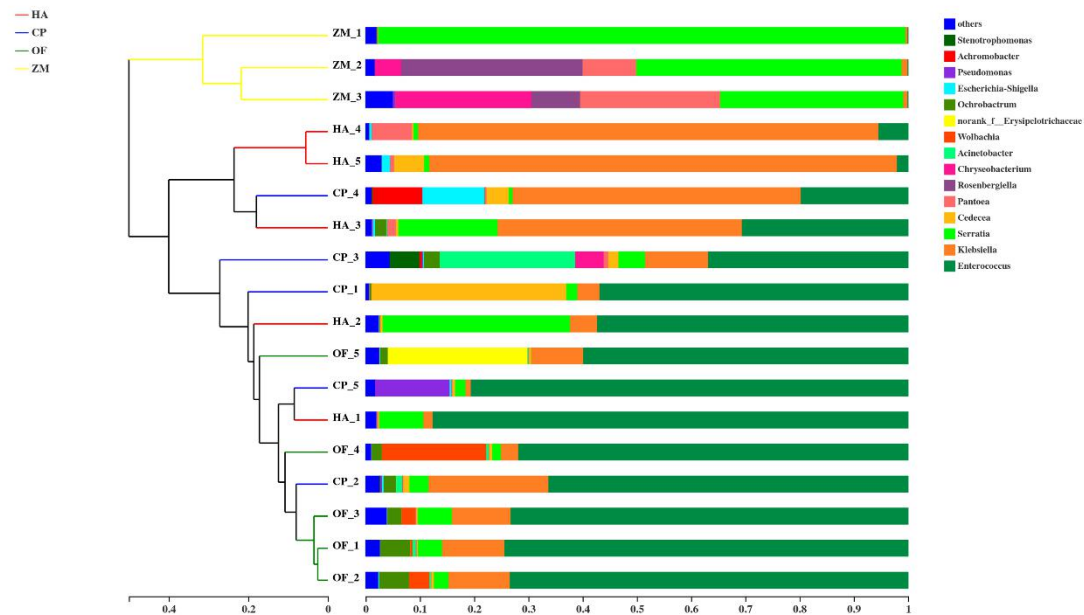

**Figure S11.** Clustering analysis based on Bray-Curtis distance algorithm at genus level. HA, *H. armigera*; CP, *C. punctiferalis*; OF, *O. furnacalis*; ZM, *Z. mays*.

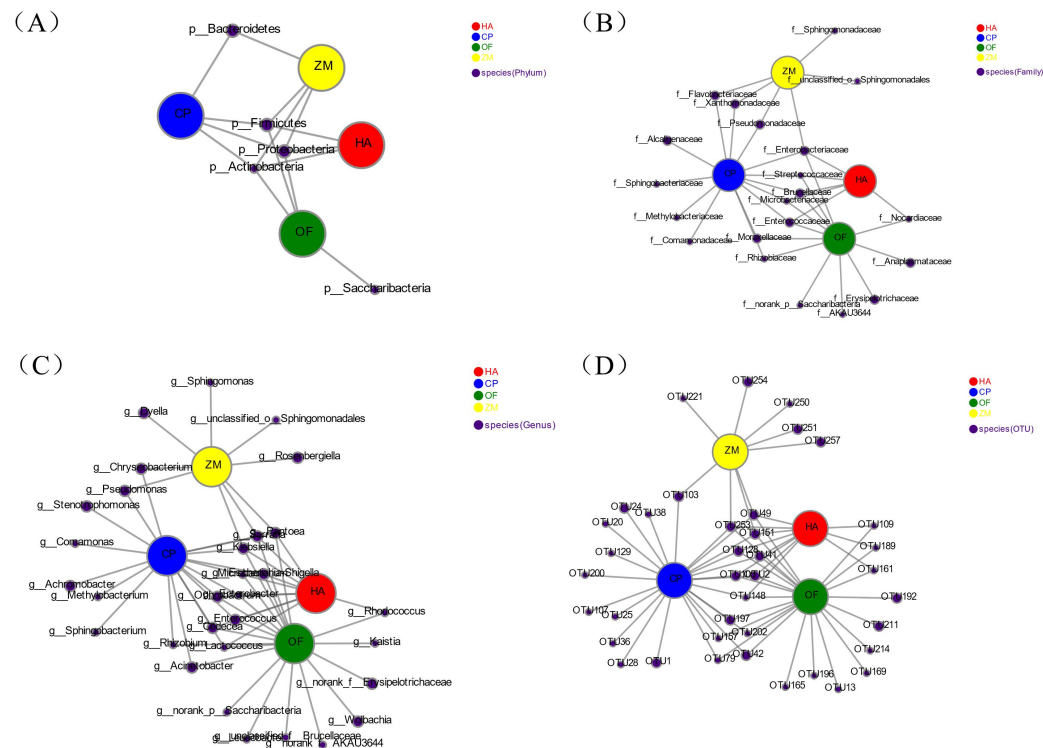

**Figure S12.** Co-occurrence network diagram of all samples at phylum level (A), family level (B), genus level (C) and OTU level (D). The network node represents a sample node or a species node, and the connection between the sample node and the species node represents that the sample contains the species. HA, *H. armigera*; CP, *C. punctiferalis*; OF, *O. furnacalis*; ZM, *Z. mays*.

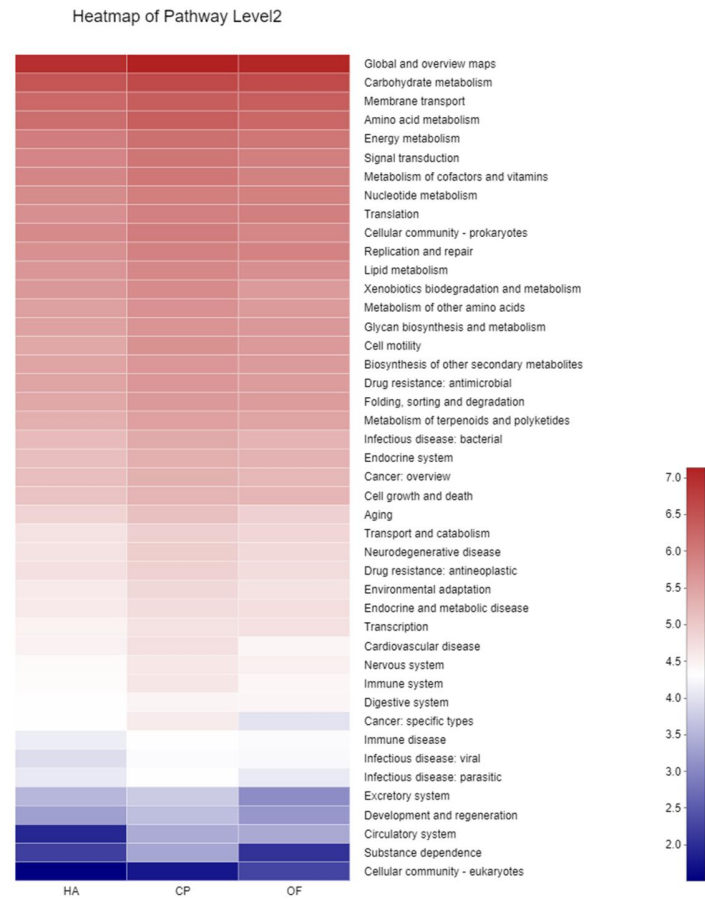

**Figure S13.** Pathway heatmap of Level2. Comparison of KEGG pathway function prediction of intestinal microbial community. HA, *H. armigera*; CP, *C. punctiferalis*; OF, *O. furnacalis*.

**Table S1.** Summary of multistage annotation information for three insect samples

| Phylum         | Class               | Order              | Family              | Genus            | OTU    | CP<br>(Total<br>OTUs) | HA<br>(Total<br>OTUs) | OF<br>(Total<br>OTUs) | SUM   |
|----------------|---------------------|--------------------|---------------------|------------------|--------|-----------------------|-----------------------|-----------------------|-------|
| Firmicutes     | Bacilli             | Lactobacillales    | Enterococcaceae     | Enterococcus     | OTU105 | 32121                 | 22398                 | 43496                 | 98015 |
| Proteobacteria | Gammaproteobacteria | Enterobacteriales  | Enterobacteriaceae  | Klebsiella       | OTU151 | 11354                 | 27533                 | 5707                  | 44594 |
| Proteobacteria | Gammaproteobacteria | Enterobacteriales  | Enterobacteriaceae  | Serratia         | OTU49  | 1617                  | 7767                  | 1869                  | 11253 |
| Proteobacteria | Gammaproteobacteria | Enterobacteriales  | Enterobacteriaceae  | Cedecea          | OTU2   | 5372                  | 845                   | 220                   | 6437  |
| Proteobacteria | Alphaproteobacteria | Rickettsiales      | Anaplasmataceae     | Wolbachia        | OTU192 | 7                     | 1                     | 3205                  | 3213  |
| Firmicutes     | Erysipelotrichia    | Erysipelotrichales | Erysipelotrichaceae | norank           | OTU211 | 7                     | 0                     | 3148                  | 3155  |
| Proteobacteria | Alphaproteobacteria | Rhizobiales        | Brucellaceae        | Ochrobactrum     | OTU128 | 684                   | 275                   | 2087                  | 3046  |
| Proteobacteria | Gammaproteobacteria | Enterobacteriales  | Enterobacteriaceae  | Escherichia      | OTU41  | 1523                  | 320                   | 67                    | 1910  |
| Proteobacteria | Gammaproteobacteria | Pseudomonadales    | Moraxellaceae       | Acinetobacter    | OTU42  | 1714                  | 2                     | 95                    | 1811  |
| Proteobacteria | Gammaproteobacteria | Pseudomonadales    | Pseudomonadaceae    | Pseudomonas      | OTU103 | 1712                  | 2                     | 8                     | 1722  |
| Proteobacteria | Gammaproteobacteria | Enterobacteriales  | Enterobacteriaceae  | Pantoea          | OTU253 | 175                   | 1230                  | 61                    | 1466  |
| Proteobacteria | Betaproteobacteria  | Burkholderiales    | Alcaligenaceae      | Achromobacter    | OTU1   | 1215                  | 5                     | 15                    | 1235  |
| Proteobacteria | Gammaproteobacteria | Pseudomonadales    | Moraxellaceae       | Acinetobacter    | OTU197 | 938                   | 5                     | 83                    | 1026  |
| Proteobacteria | Gammaproteobacteria | Enterobacteriales  | Enterobacteriaceae  | Enterobacter     | OTU148 | 248                   | 534                   | 173                   | 955   |
| Proteobacteria | Gammaproteobacteria | Xanthomonadales    | Xanthomonadaceae    | Stenotrophomonas | OTU24  | 699                   | 5                     | 3                     | 707   |
| Firmicutes     | Bacilli             | Lactobacillales    | Streptococcaceae    | Lactococcus      | OTU109 | 36                    | 143                   | 352                   | 531   |
| Proteobacteria | Gammaproteobacteria | Pseudomonadales    | Moraxellaceae       | Acinetobacter    | OTU25  | 347                   | 5                     | 9                     | 361   |
| Bacteroidetes  | Flavobacteriia      | Flavobacteriales   | Flavobacteriaceae   | Chryseobacterium | OTU200 | 342                   | 0                     | 6                     | 348   |
| Bacteroidetes  | Sphingobacteriia    | Sphingobacteriales | Sphingobacteriaceae | Sphingobacterium | OTU36  | 311                   | 0                     | 18                    | 329   |
| Proteobacteria | Alphaproteobacteria | Rhizobiales        | Rhizobiaceae        | Rhizobium        | OTU202 | 129                   | 26                    | 146                   | 301   |
| Bacteroidetes  | Flavobacteriia      | Flavobacteriales   | Flavobacteriaceae   | Chryseobacterium | OTU28  | 286                   | 1                     | 1                     | 288   |
| Actinobacteria | Actinobacteria      | Corynebacteriales  | Nocardiaceae        | Rhodococcus      | OTU189 | 39                    | 187                   | 59                    | 285   |

|                  |                     |                     |                       |                    |        |     |     |     |     |
|------------------|---------------------|---------------------|-----------------------|--------------------|--------|-----|-----|-----|-----|
| Actinobacteria   | Actinobacteria      | Micrococcales       | Microbacteriaceae     | Microbacterium     | OTU79  | 65  | 49  | 119 | 233 |
| Firmicutes       | Bacilli             | Lactobacillales     | Enterococcaceae       | Enterococcus       | OTU161 | 1   | 151 | 62  | 214 |
| Actinobacteria   | Actinobacteria      | Micrococcales       | Microbacteriaceae     | Microbacterium     | OTU157 | 81  | 4   | 108 | 193 |
| Proteobacteria   | Gammaproteobacteria | Pseudomonadales     | Moraxellaceae         | Acinetobacter      | OTU38  | 125 | 4   | 8   | 137 |
| Proteobacteria   | Gammaproteobacteria | Pseudomonadales     | Moraxellaceae         | Acinetobacter      | OTU129 | 98  | 5   | 1   | 104 |
| Actinobacteria   | Actinobacteria      | Micrococcales       | AKAU3644              | norank             | OTU214 | 3   | 0   | 93  | 96  |
| Actinobacteria   | Actinobacteria      | Micrococcales       | Microbacteriaceae     | Leucobacter        | OTU169 | 15  | 7   | 62  | 84  |
| Proteobacteria   | Alphaproteobacteria | Rhizobiales         | Brucellaceae          | unclassified       | OTU13  | 28  | 0   | 50  | 78  |
| Proteobacteria   | Betaproteobacteria  | Burkholderiales     | Comamonadaceae        | Comamonas          | OTU20  | 70  | 2   | 5   | 77  |
| Firmicutes       | Bacilli             | Lactobacillales     | Streptococcaceae      | Lactococcus        | OTU110 | 11  | 46  | 15  | 72  |
| Proteobacteria   | Alphaproteobacteria | Rhizobiales         | Rhizobiaceae          | Kaistia            | OTU165 | 16  | 0   | 52  | 68  |
| Saccharibacteria | norank              | norank              | norank                | norank             | OTU196 | 0   | 0   | 64  | 64  |
| Firmicutes       | Bacilli             | Lactobacillales     | Streptococcaceae      | Lactococcus        | OTU107 | 56  | 2   | 0   | 58  |
| Proteobacteria   | Alphaproteobacteria | Rhizobiales         | Methylobacteriaceae   | Methylobacterium   | OTU106 | 48  | 0   | 0   | 48  |
| Proteobacteria   | Gammaproteobacteria | Pseudomonadales     | Pseudomonadaceae      | Pseudomonas        | OTU10  | 41  | 0   | 6   | 47  |
| Firmicutes       | Erysipelotrichia    | Erysipelotrichales  | Erysipelotrichaceae   | norank             | OTU204 | 0   | 0   | 37  | 37  |
| Firmicutes       | Bacilli             | Lactobacillales     | unclassified          | unclassified       | OTU153 | 2   | 24  | 10  | 36  |
| Proteobacteria   | Gammaproteobacteria | Enterobacteriales   | Enterobacteriaceae    | Klebsiella         | OTU14  | 7   | 3   | 26  | 36  |
| Firmicutes       | Bacilli             | Lactobacillales     | Streptococcaceae      | Lactococcus        | OTU184 | 0   | 18  | 17  | 35  |
| Firmicutes       | Bacilli             | Lactobacillales     | Enterococcaceae       | Enterococcus       | OTU130 | 12  | 15  | 4   | 31  |
| Actinobacteria   | Actinobacteria      | Propionibacteriales | Propionibacteriaceae  | Propionibacterium  | OTU216 | 9   | 10  | 12  | 31  |
| Proteobacteria   | Gammaproteobacteria | Enterobacteriales   | Enterobacteriaceae    | unclassified       | OTU16  | 10  | 15  | 4   | 29  |
| Actinobacteria   | Actinobacteria      | Micrococcales       | Promicromonosporaceae | Cellulosimicrobium | OTU132 | 0   | 22  | 5   | 27  |
| Actinobacteria   | Actinobacteria      | Micrococcales       | Micrococcaceae        | unclassified       | OTU155 | 1   | 0   | 26  | 27  |
| Bacteroidetes    | Flavobacteriia      | Flavobacteriales    | Flavobacteriaceae     | Chryseobacterium   | OTU29  | 26  | 0   | 0   | 26  |
| Firmicutes       | Bacilli             | Lactobacillales     | Enterococcaceae       | Enterococcus       | OTU108 | 4   | 18  | 1   | 23  |

|                  |                     |                   |                     |                  |        |    |    |    |    |
|------------------|---------------------|-------------------|---------------------|------------------|--------|----|----|----|----|
| Firmicutes       | Bacilli             | Bacillales        | Bacillaceae         | Anoxybacillus    | OTU125 | 7  | 8  | 8  | 23 |
| Proteobacteria   | Gammaproteobacteria | Pseudomonadales   | Pseudomonadaceae    | Pseudomonas      | OTU133 | 0  | 21 | 2  | 23 |
| Proteobacteria   | Alphaproteobacteria | Sphingomonadales  | Sphingomonadaceae   | Novosphingobium  | OTU32  | 17 | 0  | 1  | 18 |
| Bacteroidetes    | Flavobacteriia      | Flavobacteriales  | Flavobacteriaceae   | Empedobacter     | OTU31  | 18 | 0  | 0  | 18 |
| Firmicutes       | Bacilli             | Bacillales        | Paenibacillaceae    | Paenibacillus    | OTU212 | 3  | 0  | 14 | 17 |
| Saccharibacteria | norank              | norank            | norank              | norank           | OTU199 | 1  | 0  | 16 | 17 |
| Saccharibacteria | norank              | norank            | norank              | norank           | OTU12  | 2  | 0  | 12 | 14 |
| Proteobacteria   | Alphaproteobacteria | Rhizobiales       | Methylobacteriaceae | Methylobacterium | OTU210 | 4  | 6  | 4  | 14 |
| Firmicutes       | Bacilli             | Lactobacillales   | unclassified        | unclassified     | OTU9   | 2  | 11 | 1  | 14 |
| Firmicutes       | Bacilli             | Bacillales        | Staphylococcaceae   | Staphylococcus   | OTU246 | 6  | 3  | 3  | 12 |
| Proteobacteria   | Gammaproteobacteria | Enterobacteriales | Enterobacteriaceae  | Rosenbergiella   | OTU251 | 8  | 2  | 2  | 12 |
| Proteobacteria   | Gammaproteobacteria | Enterobacteriales | Enterobacteriaceae  | Pectobacterium   | OTU175 | 3  | 3  | 5  | 11 |
| Proteobacteria   | Gammaproteobacteria | Enterobacteriales | Enterobacteriaceae  | unclassified     | OTU178 | 3  | 0  | 7  | 10 |
| Proteobacteria   | Alphaproteobacteria | Caulobacterales   | Caulobacteraceae    | Caulobacter      | OTU102 | 9  | 1  | 0  | 10 |
| Proteobacteria   | Alphaproteobacteria | Rhodobacterales   | Rhodobacteraceae    | unclassified     | OTU15  | 8  | 0  | 0  | 8  |
| Proteobacteria   | Gammaproteobacteria | Xanthomonadales   | Xanthomonadaceae    | Stenotrophomonas | OTU40  | 8  | 0  | 0  | 8  |
| Actinobacteria   | Actinobacteria      | Corynebacteriales | Nocardiaceae        | Rhodococcus      | OTU186 | 0  | 0  | 8  | 8  |
| Bacteroidetes    | Flavobacteriia      | Flavobacteriales  | Flavobacteriaceae   | Empedobacter     | OTU174 | 0  | 0  | 7  | 7  |
| Proteobacteria   | Alphaproteobacteria | Rhizobiales       | Beijerinckiaceae    | Qingshengfania   | OTU173 | 0  | 0  | 7  | 7  |
| Proteobacteria   | Gammaproteobacteria | Pseudomonadales   | Pseudomonadaceae    | Pseudomonas      | OTU183 | 5  | 1  | 1  | 7  |
| Firmicutes       | Bacilli             | Bacillales        | Paenibacillaceae    | Ammoniphilus     | OTU194 | 2  | 2  | 3  | 7  |
| Proteobacteria   | Betaproteobacteria  | Burkholderiales   | Comamonadaceae      | Comamonas        | OTU179 | 0  | 0  | 6  | 6  |
| Bacteroidetes    | Bacteroidia         | Bacteroidales     | Rikenellaceae       | Rikenellaceae    | OTU172 | 1  | 2  | 3  | 6  |
| Proteobacteria   | Gammaproteobacteria | Pseudomonadales   | Pseudomonadaceae    | Pseudomonas      | OTU111 | 0  | 6  | 0  | 6  |
| unclassified     | unclassified        | unclassified      | unclassified        | unclassified     | OTU150 | 0  | 5  | 0  | 5  |
| Proteobacteria   | Gammaproteobacteria | Pasteurellales    | Pasteurellaceae     | Haemophilus      | OTU116 | 0  | 2  | 3  | 5  |



|                  |                     |                   |                         |                 |        |   |   |   |   |
|------------------|---------------------|-------------------|-------------------------|-----------------|--------|---|---|---|---|
| Proteobacteria   | Betaproteobacteria  | Burkholderiales   | Comamonadaceae          | Lampropedia     | OTU168 | 2 | 0 | 3 | 5 |
| Proteobacteria   | Gammaproteobacteria | Pseudomonadales   | Moraxellaceae           | Acinetobacter   | OTU195 | 1 | 0 | 3 | 4 |
| Actinobacteria   | Actinobacteria      | Corynebacteriales | Corynebacteriaceae      | Corynebacterium | OTU248 | 0 | 2 | 2 | 4 |
| Firmicutes       | Clostridia          | Clostridiales     | Family_XI_Clostridiales | Ezakiella       | OTU33  | 4 | 0 | 0 | 4 |
| Actinobacteria   | Actinobacteria      | Micrococcales     | Cellulomonadaceae       | Cellulomonas    | OTU223 | 3 | 0 | 1 | 4 |
| Proteobacteria   | Alphaproteobacteria | Rhodospirillales  | Acetobacteraceae        | Roseomonas      | OTU27  | 2 | 0 | 2 | 4 |
| Proteobacteria   | Gammaproteobacteria | Pseudomonadales   | Moraxellaceae           | Acinetobacter   | OTU19  | 4 | 0 | 0 | 4 |
| Proteobacteria   | Gammaproteobacteria | Pseudomonadales   | Moraxellaceae           | Enhydrobacter   | OTU242 | 0 | 2 | 2 | 4 |
| Firmicutes       | Bacilli             | unclassified      | unclassified            | unclassified    | OTU209 | 2 | 0 | 2 | 4 |
| Firmicutes       | Bacilli             | Lactobacillales   | Leuconostocaceae        | Leuconostoc     | OTU122 | 2 | 2 | 0 | 4 |
| Firmicutes       | Bacilli             | Bacillales        | Bacillaceae             | Bacillus        | OTU198 | 3 | 1 | 0 | 4 |
| Proteobacteria   | Alphaproteobacteria | Rhizobiales       | Brucellaceae            | unclassified    | OTU17  | 4 | 0 | 0 | 4 |
| Actinobacteria   | Actinobacteria      | Micrococcales     | Beutenbergiaceae        | Salana          | OTU34  | 4 | 0 | 0 | 4 |
| Firmicutes       | Bacilli             | Bacillales        | Paenibacillaceae        | Paenibacillus   | OTU85  | 4 | 0 | 0 | 4 |
| Saccharibacteria | norank              | norank            | norank                  | norank          | OTU164 | 1 | 0 | 3 | 4 |
| Proteobacteria   | Betaproteobacteria  | Burkholderiales   | Comamonadaceae          | Comamonas       | OTU238 | 1 | 0 | 3 | 4 |
| Actinobacteria   | Actinobacteria      | Micrococcales     | Micrococcaceae          | Arthrobacter    | OTU104 | 4 | 0 | 0 | 4 |
| Firmicutes       | Clostridia          | Clostridiales     | Lachnospiraceae         | norank          | OTU113 | 0 | 3 | 0 | 3 |
| Firmicutes       | Clostridia          | Clostridiales     | Family_XI_Clostridiales | Peptoniphilus   | OTU35  | 3 | 0 | 0 | 3 |
| Proteobacteria   | Betaproteobacteria  | Burkholderiales   | Comamonadaceae          | Delftia         | OTU185 | 0 | 0 | 3 | 3 |
| Actinobacteria   | Actinobacteria      | Micrococcales     | Microbacteriaceae       | Leucobacter     | OTU127 | 2 | 1 | 0 | 3 |
| Proteobacteria   | Alphaproteobacteria | Rhizobiales       | Hyphomicrobiaceae       | Devosia         | OTU167 | 1 | 0 | 2 | 3 |
| Firmicutes       | Clostridia          | Clostridiales     | Ruminococcaceae         | Ruminococcaceae | OTU120 | 0 | 3 | 0 | 3 |
| Firmicutes       | Bacilli             | Bacillales        | Bacillaceae             | Bacillus        | OTU48  | 1 | 2 | 0 | 3 |
| Actinobacteria   | Actinobacteria      | Corynebacteriales | Corynebacteriaceae      | Lawsonella      | OTU217 | 1 | 0 | 2 | 3 |
| Proteobacteria   | Alphaproteobacteria | Rhizobiales       | Beijerinckiaceae        | Camelimonas     | OTU208 | 1 | 0 | 2 | 3 |

|                  |                     |                  |                         |                  |        |   |   |   |   |
|------------------|---------------------|------------------|-------------------------|------------------|--------|---|---|---|---|
| Proteobacteria   | unclassified        | unclassified     | unclassified            | unclassified     | OTU188 | 0 | 1 | 2 | 3 |
| Firmicutes       | Bacilli             | Lactobacillales  | Streptococcaceae        | Streptococcus    | OTU227 | 0 | 1 | 2 | 3 |
| Proteobacteria   | Alphaproteobacteria | Rhizobiales      | Bradyrhizobiaceae       | Bosea            | OTU180 | 1 | 0 | 2 | 3 |
| Actinobacteria   | Actinobacteria      | Micrococcales    | Brevibacteriaceae       | Brevibacterium   | OTU193 | 0 | 0 | 3 | 3 |
| unclassified     | unclassified        | unclassified     | unclassified            | unclassified     | OTU158 | 0 | 0 | 2 | 2 |
| Bacteroidetes    | Bacteroidia         | Bacteroidales    | Bacteroidales           | norank           | OTU3   | 1 | 0 | 1 | 2 |
| Bacteroidetes    | Bacteroidia         | Bacteroidales    | Prevotellaceae          | Prevotellaceae   | OTU177 | 0 | 0 | 2 | 2 |
| Bacteroidetes    | Bacteroidia         | Bacteroidales    | Rikenellaceae           | Rikenella        | OTU166 | 0 | 2 | 0 | 2 |
| Bacteroidetes    | Bacteroidia         | Bacteroidales    | Bacteroidaceae          | Bacteroides      | OTU7   | 0 | 2 | 0 | 2 |
| Bacteroidetes    | Bacteroidia         | Bacteroidales    | Prevotellaceae          | Alloprevotella   | OTU135 | 1 | 0 | 1 | 2 |
| Proteobacteria   | Gammaproteobacteria | Pseudomonadales  | Pseudomonadaceae        | Pseudomonas      | OTU90  | 2 | 0 | 0 | 2 |
| Firmicutes       | Clostridia          | Clostridiales    | Ruminococcaceae         | Anaerotruncus    | OTU126 | 0 | 2 | 0 | 2 |
| Proteobacteria   | Gammaproteobacteria | Xanthomonadales  | Xanthomonadaceae        | Dyella           | OTU257 | 2 | 0 | 0 | 2 |
| Saccharibacteria | norank              | norank           | norank                  | norank           | OTU213 | 1 | 0 | 1 | 2 |
| Proteobacteria   | Alphaproteobacteria | Rhizobiales      | Aurantimonadaceae       | Aureimonas       | OTU170 | 1 | 1 | 0 | 2 |
| Proteobacteria   | Alphaproteobacteria | Rhizobiales      | Bradyrhizobiaceae       | Bradyrhizobium   | OTU114 | 0 | 2 | 0 | 2 |
| Firmicutes       | Clostridia          | Clostridiales    | Family_XI_Clostridiales | Anaerococcus     | OTU234 | 2 | 0 | 0 | 2 |
| Bacteroidetes    | Bacteroidia         | Bacteroidales    | Bacteroidaceae          | Bacteroides      | OTU119 | 0 | 2 | 0 | 2 |
| Bacteroidetes    | Bacteroidia         | Bacteroidales    | Bacteroidales           | norank           | OTU145 | 0 | 0 | 2 | 2 |
| Firmicutes       | Clostridia          | Clostridiales    | Lachnospiraceae         | Lachnospiraceae  | OTU159 | 1 | 0 | 1 | 2 |
| Firmicutes       | Bacilli             | Bacillales       | Planococcaceae          | Solibacillus     | OTU233 | 2 | 0 | 0 | 2 |
| Bacteroidetes    | Bacteroidia         | Bacteroidales    | Bacteroidales           | norank           | OTU154 | 0 | 0 | 2 | 2 |
| Bacteroidetes    | Flavobacteriia      | Flavobacteriales | Flavobacteriaceae       | Chryseobacterium | OTU254 | 2 | 0 | 0 | 2 |
| Bacteroidetes    | Bacteroidia         | Bacteroidales    | Bacteroidales           | norank           | OTU176 | 1 | 0 | 0 | 1 |
| Proteobacteria   | Betaproteobacteria  | Burkholderiales  | Comamonadaceae          | Aquabacterium    | OTU201 | 0 | 0 | 1 | 1 |
| Bacteroidetes    | Flavobacteriia      | Flavobacteriales | Flavobacteriaceae       | Elizabethkingia  | OTU68  | 1 | 0 | 0 | 1 |

|                |                     |                     |                         |                   |        |   |   |   |   |
|----------------|---------------------|---------------------|-------------------------|-------------------|--------|---|---|---|---|
| Bacteroidetes  | Bacteroidia         | Bacteroidales       | Bacteroidales           | norank            | OTU140 | 0 | 0 | 1 | 1 |
| Firmicutes     | Bacilli             | Bacillales          | Paenibacillaceae        | Paenibacillus     | OTU11  | 1 | 0 | 0 | 1 |
| Proteobacteria | Alphaproteobacteria | Caulobacterales     | Caulobacteraceae        | Brevundimonas     | OTU205 | 1 | 0 | 0 | 1 |
| Proteobacteria | Alphaproteobacteria | Sphingomonadales    | Sphingomonadaceae       | Sphingobium       | OTU121 | 0 | 1 | 0 | 1 |
| Proteobacteria | Alphaproteobacteria | Caulobacterales     | Hyphomonadaceae         | norank            | OTU112 | 0 | 1 | 0 | 1 |
| Proteobacteria | Alphaproteobacteria | Rhizobiales         | Rhizobiaceae            | Rhizobium         | OTU187 | 0 | 0 | 1 | 1 |
| Actinobacteria | Actinobacteria      | Corynebacteriales   | Corynebacteriaceae      | Corynebacterium   | OTU181 | 0 | 0 | 1 | 1 |
| Bacteroidetes  | Bacteroidia         | Bacteroidales       | Bacteroidales           | norank            | OTU171 | 0 | 0 | 1 | 1 |
| Proteobacteria | Betaproteobacteria  | Burkholderiales     | Burkholderiaceae        | Burkholderia      | OTU75  | 1 | 0 | 0 | 1 |
| Actinobacteria | Actinobacteria      | Propionibacteriales | Nocardiodaceae          | Nocardioides      | OTU182 | 1 | 0 | 0 | 1 |
| Proteobacteria | Gammaproteobacteria | Enterobacteriales   | Enterobacteriaceae      | Serratia          | OTU160 | 0 | 0 | 1 | 1 |
| Actinobacteria | Actinobacteria      | Propionibacteriales | Propionibacteriaceae    | Propionibacterium | OTU5   | 0 | 0 | 1 | 1 |
| Actinobacteria | Actinobacteria      | Corynebacteriales   | Corynebacteriaceae      | Corynebacterium   | OTU52  | 0 | 0 | 1 | 1 |
| Bacteroidetes  | Bacteroidia         | Bacteroidales       | Bacteroidales           | norank            | OTU26  | 0 | 1 | 0 | 1 |
| Proteobacteria | Alphaproteobacteria | Rhodobacterales     | Rhodobacteraceae        | unclassified      | OTU144 | 0 | 1 | 0 | 1 |
| Proteobacteria | Gammaproteobacteria | Chromatiales        | Chromatiaceae           | Rheinheimera      | OTU146 | 1 | 0 | 0 | 1 |
| Bacteroidetes  | Sphingobacteriia    | Sphingobacteriales  | Chitinophagaceae        | Taibaiella        | OTU229 | 1 | 0 | 0 | 1 |
| Proteobacteria | Deltaproteobacteria | Desulfovibrionales  | Desulfovibrionaceae     | Desulfovibrio     | OTU6   | 1 | 0 | 0 | 1 |
| Proteobacteria | Gammaproteobacteria | Enterobacteriales   | Enterobacteriaceae      | Serratia          | OTU8   | 0 | 1 | 0 | 1 |
| Proteobacteria | Betaproteobacteria  | Burkholderiales     | Burkholderiaceae        | Pandoraea         | OTU207 | 0 | 0 | 1 | 1 |
| Firmicutes     | Clostridia          | Clostridiales       | Lachnospiraceae         | unclassified      | OTU124 | 0 | 1 | 0 | 1 |
| Firmicutes     | Bacilli             | Lactobacillales     | Lactobacillaceae        | Lactobacillus     | OTU249 | 0 | 1 | 0 | 1 |
| Bacteroidetes  | Bacteroidia         | Bacteroidales       | Bacteroidales           | norank            | OTU123 | 0 | 1 | 0 | 1 |
| Proteobacteria | Alphaproteobacteria | Caulobacterales     | Caulobacteraceae        | Brevundimonas     | OTU37  | 0 | 0 | 1 | 1 |
| Firmicutes     | Clostridia          | Clostridiales       | Family_XI_Clostridiales | Anaerococcus      | OTU118 | 1 | 0 | 0 | 1 |
| Firmicutes     | Clostridia          | Clostridiales       | Family_XI_Clostridiales | Finegoldia        | OTU131 | 1 | 0 | 0 | 1 |

|                |                     |                  |                     |                  |        |   |   |   |   |
|----------------|---------------------|------------------|---------------------|------------------|--------|---|---|---|---|
| Proteobacteria | Alphaproteobacteria | Rhodospirillales | Acetobacteraceae    | Asaia            | OTU98  | 1 | 0 | 0 | 1 |
| Proteobacteria | Alphaproteobacteria | Rhizobiales      | Methylobacteriaceae | Methylobacterium | OTU100 | 0 | 0 | 1 | 1 |
| Firmicutes     | Clostridia          | Clostridiales    | Ruminococcaceae     | unclassified     | OTU117 | 0 | 1 | 0 | 1 |

The first five columns were the species names OF the corresponding phylum, class, order, family, and genus, and the sixth column was the OTU numbering information corresponding to this species. CP (total OTUs) was the abundance sum (sequence number) of each OTU corresponding to all samples of *C. punctiferalis*, HA (total OTUs) was the abundance sum (sequence number) of each OTU corresponding to all samples of *H. armigera*, OF (total OTUs) was the abundance sum (sequence number) of each OTU corresponding to all samples of *O. furnacalis*, and SUM was the abundance sum of this species in all samples of three insects.

**Table S2.** Summary of Multi-level Annotation Information of Corn Samples

| Phylum         | Class               | Order               | Family               | Genus             | OTU    | ZM(total OTUs) |
|----------------|---------------------|---------------------|----------------------|-------------------|--------|----------------|
| Proteobacteria | Gammaproteobacteria | Enterobacteriales   | Enterobacteriaceae   | Serratia          | OTU49  | 22230          |
| Proteobacteria | Gammaproteobacteria | Enterobacteriales   | Enterobacteriaceae   | Rosenbergiella    | OTU251 | 5247           |
| Proteobacteria | Gammaproteobacteria | Enterobacteriales   | Enterobacteriaceae   | Pantoea           | OTU253 | 4414           |
| Bacteroidetes  | Flavobacteriia      | Flavobacteriales    | Flavobacteriaceae    | Chryseobacterium  | OTU254 | 3689           |
| Proteobacteria | Gammaproteobacteria | Xanthomonadales     | Xanthomonadaceae     | Dyella            | OTU257 | 690            |
| Proteobacteria | Gammaproteobacteria | Enterobacteriales   | Enterobacteriaceae   | Klebsiella        | OTU151 | 282            |
| Proteobacteria | Gammaproteobacteria | Pseudomonadales     | Pseudomonadaceae     | Pseudomonas       | OTU103 | 60             |
| Proteobacteria | Alphaproteobacteria | Sphingomonadales    | unclassified         | unclassified      | OTU221 | 50             |
| Proteobacteria | Alphaproteobacteria | Sphingomonadales    | Sphingomonadaceae    | Sphingomonas      | OTU250 | 41             |
| Proteobacteria | Alphaproteobacteria | Rhizobiales         | Rhizobiaceae         | Rhizobium         | OTU202 | 27             |
| Bacteroidetes  | Cytophagia          | Cytophagales        | Cytophagaceae        | Sporocytophaga    | OTU232 | 26             |
| Proteobacteria | Gammaproteobacteria | Enterobacteriales   | Enterobacteriaceae   | unclassified      | OTU16  | 20             |
| Proteobacteria | Betaproteobacteria  | Burkholderiales     | Oxalobacteraceae     | norank            | OTU239 | 18             |
| Proteobacteria | Gammaproteobacteria | Enterobacteriales   | Enterobacteriaceae   | Cedecea           | OTU2   | 17             |
| Bacteroidetes  | Sphingobacteriia    | Sphingobacteriales  | Sphingobacteriaceae  | Sphingobacterium  | OTU36  | 14             |
| Actinobacteria | Actinobacteria      | Micrococcales       | Microbacteriaceae    | Leucobacter       | OTU169 | 13             |
| Proteobacteria | Alphaproteobacteria | Rhizobiales         | Brucellaceae         | Ochrobactrum      | OTU128 | 12             |
| Proteobacteria | Gammaproteobacteria | Xanthomonadales     | Xanthomonadaceae     | Xanthomonas       | OTU255 | 12             |
| Firmicutes     | Bacilli             | Lactobacillales     | Lactobacillaceae     | Lactobacillus     | OTU231 | 11             |
| Actinobacteria | Actinobacteria      | Propionibacteriales | Propionibacteriaceae | Propionibacterium | OTU216 | 10             |
| Proteobacteria | Alphaproteobacteria | Rhodobacterales     | Rhodobacteraceae     | Rubellimicrobium  | OTU241 | 9              |
| Proteobacteria | Alphaproteobacteria | Rhizobiales         | Methylobacteriaceae  | Methylobacterium  | OTU210 | 9              |
| Chloroflexi    | Anaerolineae        | Anaerolineales      | Anaerolineaceae      | norank            | OTU237 | 9              |
| Firmicutes     | Bacilli             | Bacillales          | Planococcaceae       | Solibacillus      | OTU233 | 9              |

|                  |                     |                   |                         |                      |        |   |
|------------------|---------------------|-------------------|-------------------------|----------------------|--------|---|
| Proteobacteria   | Alphaproteobacteria | Rhodospirillales  | Acetobacteraceae        | Asaia                | OTU98  | 9 |
| Proteobacteria   | Gammaproteobacteria | Enterobacteriales | Enterobacteriaceae      | Escherichia-Shigella | OTU41  | 8 |
| Actinobacteria   | Actinobacteria      | Micrococcales     | Microbacteriaceae       | Microbacterium       | OTU79  | 8 |
| Proteobacteria   | Gammaproteobacteria | Xanthomonadales   | Xanthomonadaceae        | Pseudoxanthomonas    | OTU256 | 7 |
| Firmicutes       | Bacilli             | Bacillales        | Bacillaceae             | Bacillus             | OTU4   | 7 |
| Firmicutes       | Clostridia          | Clostridiales     | Family_XI_Clostridiales | Peptoniphilus        | OTU235 | 7 |
| Proteobacteria   | Betaproteobacteria  | Burkholderiales   | Comamonadaceae          | Aquabacterium        | OTU201 | 6 |
| Firmicutes       | Bacilli             | Bacillales        | Bacillaceae             | Bacillus             | OTU198 | 6 |
| Firmicutes       | Bacilli             | Lactobacillales   | Streptococcaceae        | Lactococcus          | OTU109 | 5 |
| Firmicutes       | Bacilli             | Bacillales        | Staphylococcaceae       | Staphylococcus       | OTU246 | 5 |
| Proteobacteria   | Gammaproteobacteria | Xanthomonadales   | Xanthomonadaceae        | Stenotrophomonas     | OTU24  | 5 |
| Proteobacteria   | Gammaproteobacteria | Enterobacteriales | Enterobacteriaceae      | Enterobacter         | OTU148 | 5 |
| Proteobacteria   | Alphaproteobacteria | Caulobacterales   | Caulobacteraceae        | Caulobacter          | OTU102 | 5 |
| Proteobacteria   | Alphaproteobacteria | Rhodobacterales   | Rhodobacteraceae        | unclassified         | OTU15  | 4 |
| Firmicutes       | Bacilli             | Lactobacillales   | Streptococcaceae        | Lactococcus          | OTU107 | 4 |
| Bacteroidetes    | Flavobacteriia      | Flavobacteriales  | Flavobacteriaceae       | Flavobacterium       | OTU240 | 4 |
| Proteobacteria   | Gammaproteobacteria | Pseudomonadales   | Moraxellaceae           | Enhydrobacter        | OTU242 | 4 |
| Proteobacteria   | Gammaproteobacteria | Pseudomonadales   | Moraxellaceae           | Acinetobacter        | OTU25  | 4 |
| Bacteroidetes    | Cytophagia          | Cytophagales      | unclassified            | unclassified         | OTU222 | 4 |
| Proteobacteria   | Betaproteobacteria  | Burkholderiales   | Oxalobacteraceae        | Massilia             | OTU23  | 3 |
| Firmicutes       | Clostridia          | Clostridiales     | Family_XI_Clostridiales | Ezakiella            | OTU33  | 3 |
| Saccharibacteria | norank              | norank            | norank                  | norank               | OTU12  | 3 |
| Firmicutes       | Clostridia          | Clostridiales     | Family_XI_Clostridiales | Anaerococcus         | OTU234 | 3 |
| Proteobacteria   | Betaproteobacteria  | Rhodocyclales     | Rhodocyclaceae          | Zoogloea             | OTU228 | 3 |
| Proteobacteria   | Betaproteobacteria  | Burkholderiales   | Comamonadaceae          | Comamonas            | OTU238 | 3 |
| Actinobacteria   | Actinobacteria      | Corynebacteriales | Corynebacteriaceae      | Corynebacterium      | OTU248 | 2 |

|                |                     |                   |                            |                  |        |   |
|----------------|---------------------|-------------------|----------------------------|------------------|--------|---|
| Proteobacteria | Alphaproteobacteria | Rhizobiales       | Rhizobiales_Incertae_Sedis | Rhizomicrobium   | OTU230 | 2 |
| Proteobacteria | Gammaproteobacteria | Pseudomonadales   | Pseudomonadaceae           | Pseudomonas      | OTU88  | 2 |
| Proteobacteria | Alphaproteobacteria | Rhizobiales       | Phyllobacteriaceae         | Aquamicrobium    | OTU224 | 2 |
| Firmicutes     | Clostridia          | Clostridiales     | Family_XI_Clostridiales    | Finegoldia       | OTU131 | 2 |
| Proteobacteria | Alphaproteobacteria | Rhizobiales       | Methylobacteriaceae        | Methylobacterium | OTU100 | 2 |
| Actinobacteria | Actinobacteria      | Streptomycetales  | Streptomycetaceae          | Streptomyces     | OTU89  | 2 |
| Firmicutes     | Bacilli             | Lactobacillales   | Enterococcaceae            | Enterococcus     | OTU105 | 1 |
| Proteobacteria | Betaproteobacteria  | Burkholderiales   | Alcaligenaceae             | Achromobacter    | OTU1   | 1 |
| Actinobacteria | Actinobacteria      | Micrococcales     | Microbacteriaceae          | Microbacterium   | OTU157 | 1 |
| Proteobacteria | Gammaproteobacteria | Pseudomonadales   | Moraxellaceae              | Perlucidibaca    | OTU156 | 1 |
| Firmicutes     | Bacilli             | Bacillales        | Bacillaceae                | Oceanobacillus   | OTU65  | 1 |
| Proteobacteria | Alphaproteobacteria | Rhizobiales       | Hyphomicrobiaceae          | Devosia          | OTU167 | 1 |
| Firmicutes     | Bacilli             | Bacillales        | Bacillaceae                | Bacillus         | OTU48  | 1 |
| Firmicutes     | Bacilli             | Lactobacillales   | Leuconostocaceae           | Leuconostoc      | OTU122 | 1 |
| Proteobacteria | Gammaproteobacteria | Pseudomonadales   | Pseudomonadaceae           | Pseudomonas      | OTU183 | 1 |
| Proteobacteria | Alphaproteobacteria | Rhizobiales       | Brucellaceae               | unclassified     | OTU13  | 1 |
| Proteobacteria | Gammaproteobacteria | Enterobacteriales | Enterobacteriaceae         | Serratia         | OTU8   | 1 |
| Actinobacteria | Actinobacteria      | Micrococcales     | Beutenbergiaceae           | Salana           | OTU34  | 1 |
| Actinobacteria | Actinobacteria      | Corynebacteriales | Nocardiaceae               | Rhodococcus      | OTU189 | 1 |
| Firmicutes     | Bacilli             | Lactobacillales   | Lactobacillaceae           | Lactobacillus    | OTU249 | 1 |
| Actinobacteria | Actinobacteria      | Micrococcales     | Micrococcaceae             | Arthrobacter     | OTU104 | 1 |
| Proteobacteria | Gammaproteobacteria | Pseudomonadales   | Moraxellaceae              | Acinetobacter    | OTU42  | 1 |

The first five columns were the species names of the corresponding phylum, class, order, family and genus, and the sixth column was the OTU numbering information corresponding to that species. ZM(total OTUs) was the abundance sum (sequence number) of each OTU corresponding to all samples of maize.
